# Supplementary material
Source: Springer Nature journal article supplement (https://www.springermedizin.de/resource/supplementary/12958_2013_1147_MOESM3_ESM.pdf/9566888)

**ROCK-2**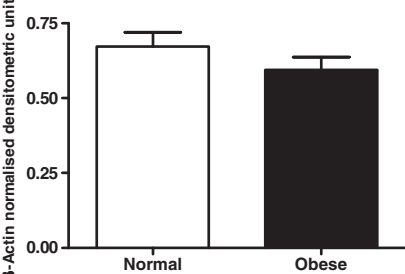**RhoE/RND3**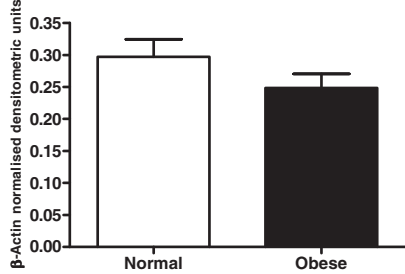**RhoA**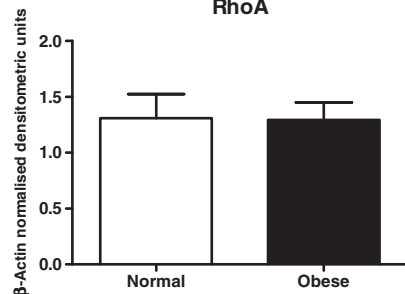**RhoGDI**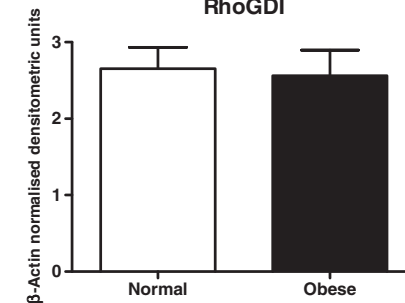**pMoesin**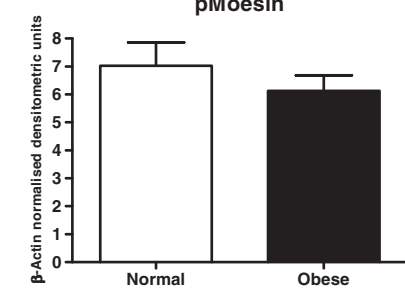**OTR**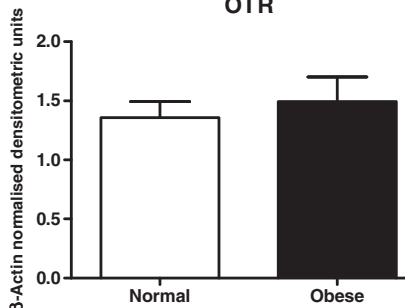**Caspase 3**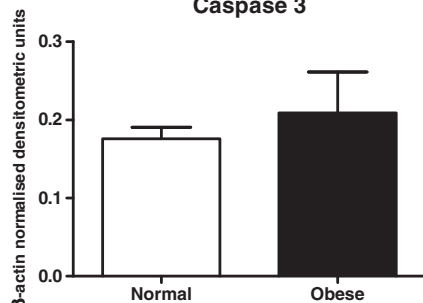**pMAPK**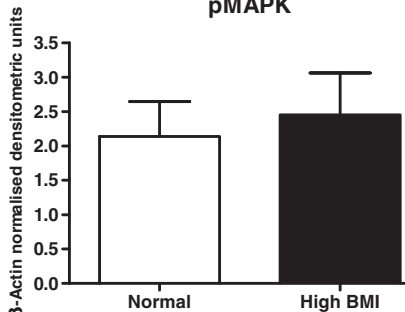

Supplement: MOESM3 [file 9566888]
